# Supplementary material for: Non-steroidal anti-inflammatory drug use is determined by disease activity in axSpA and decreased by biologicals: a longitudinal analysis
Source: Research Square preprint supplement (doi:10.21203/rs.3.rs-1033541/v1), 2021-11-18
Supplement: Supplementary file 1 [file 3ab3a0ecd7e1df5792038537.docx]

**Non-steroidal anti-inflammatory drug use is determined by disease activity in axSpA and decreased by biologicals: a longitudinal analysis**

**Suplementary File**

**Figures**

**Figure 1.**The proportion of NSAID use at 0, 12, 24, 52 weeks in treatment groups

**Figure 2.** MedianASDAS-NSAID scores at 0, 12, 24, 52 weeks in treatment groups

**Figure 3.** Median BASDAI scores at 0, 12, 24, 52 weeks in treatment groups

**Figure 4.** Median BASFI scores at 0, 12, 24, 52 weeks in treatment groups

**Figure 5.** Median ASDAS-CRP scores at 0, 12, 24, 52 weeks in treatment groups

**Figure 6.** Median serum CRP levels at 0, 12, 52 weeks in treatment groups

**Figure 7.** MedianPGA of disease activity scores at 0, 12, 24, 52 weeks in treatment groups

**Figure 1.** The proportion of NSAID use at 0, 12, 24, 52 weeks in treatment groups

**
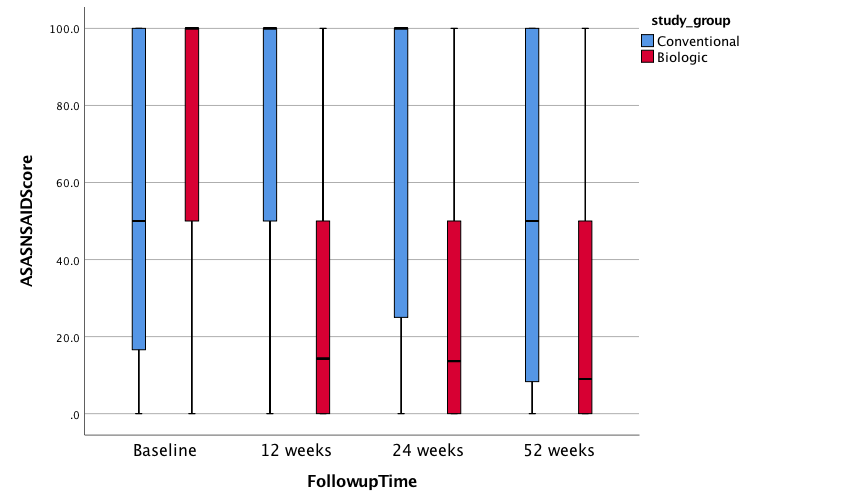
**

**Figure 2.** Median ASDAS-NSAID scores at 0, 12, 24, 52 weeks in treatment groups


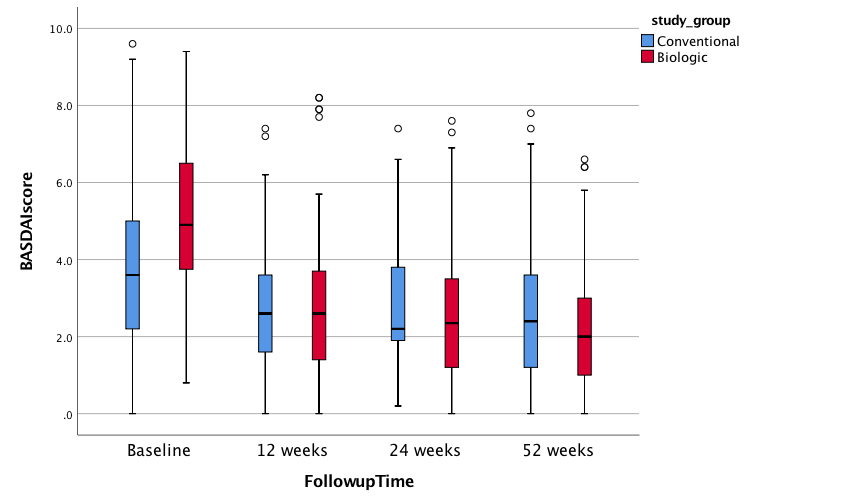


**Figure 3.** MedianBASDAI scores at 0, 12, 24, 52 weeks in treatment groups

**
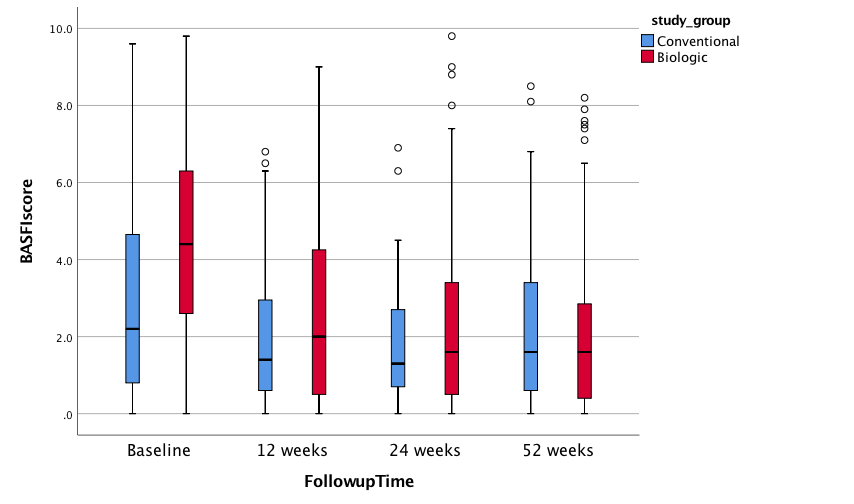
**

**Figure 4.** Median BASFI scores at 0, 12, 24, 52 weeks in treatment groups

**
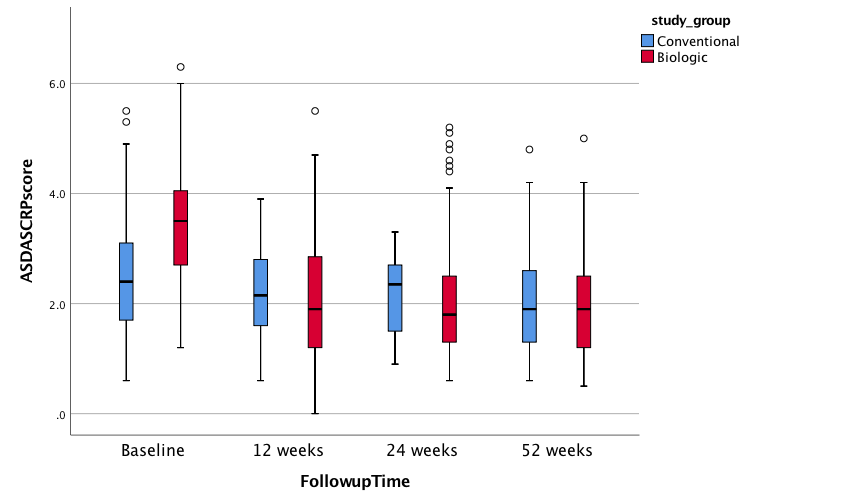
**

**Figure 5.** Median ASDAS-CRP scores at 0, 12, 24, 52 weeks in treatment groups

**
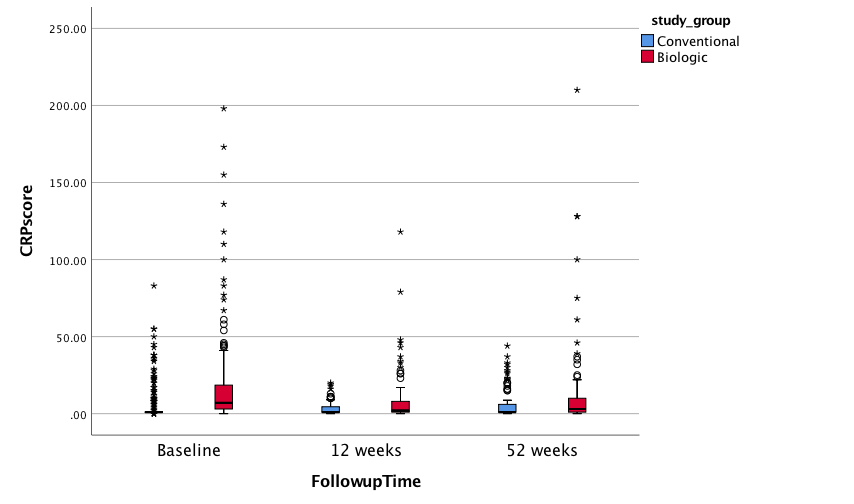
**

**Figure 6.** Medianserum CRP levels at 0, 12, 52 weeks in treatment groups

**
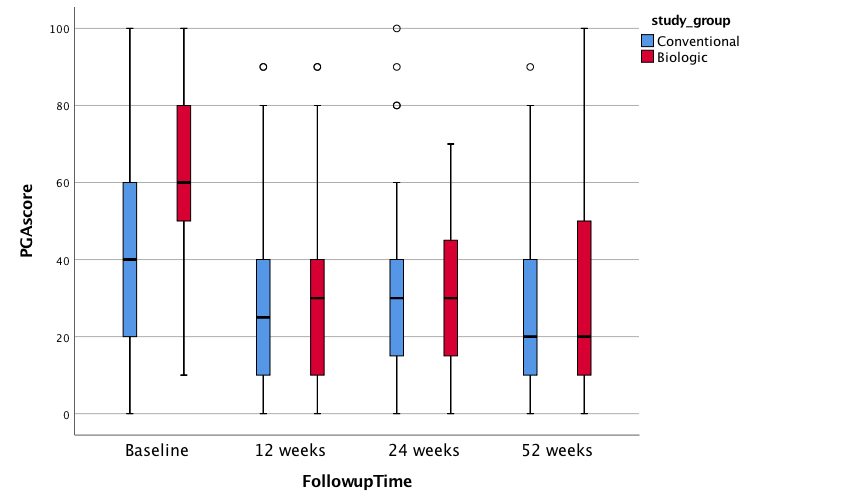
**

**Figure 7.** MedianPGA of disease activity scores at 0, 12, 24, 52 weeks in treatement groups
